# Supplementary material for: Identification of early stage recurrence endometrial cancer biomarkers using bioinformatics tools
Source: PubMed Central journal article supplement — Oncol Rep. 2020 Jun 16;44(3):873–86. doi: 10.3892/or.2020.7648 (PMC7388212; doi:10.3892/or.2020.7648), 2020-06-16
Supplement: Supplementary_Data.pdf [file Supplementary_Data.pdf]

Figure S1. Reverse transcription-quantitative PCR analysis of *ETV5* mRNA expression levels in parental and *ETV5* stable transfectants. (A) Hec1a and Hec1a-*ETV5* EC cell lines; (B) Ishikawa and Ishikawa-*ETV5* EC cell lines. \*\* $P < 0.005$ , unpaired Student's t-test. EC, endometrial cancer; *ETV5*, ETS variant transcription factor 5.

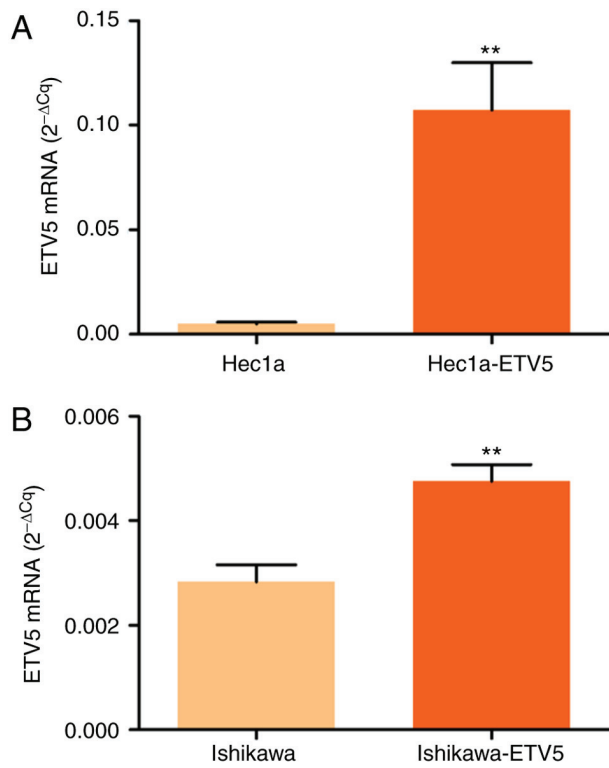

Figure S2. Survival analysis of sample clusters 1-4. Kaplan Meier graphs for (A) recurrence-free and (B) overall survival. Survival curves were constructed using the Kaplan-Meier method, and differences between sample cluster curves were analyzed by log-rank test.

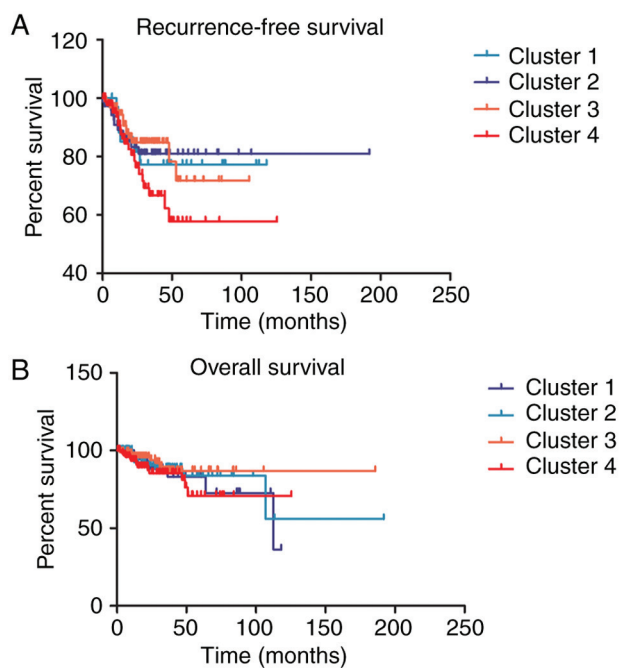

Figure S3. ROC analysis of hub genes. For each gene, ROC curve (left) and mRNA expression levels (right) in control (n=35) and tumor (n=545) samples from The Cancer Genome Atlas Uterine Corpus Endometrioid Cancer cohort are shown. mRNA levels are expressed as  $\text{Log}_2(x+1)$ , where 'x' is the RSEM normalized expression value. ROC, receiver operating characteristic.

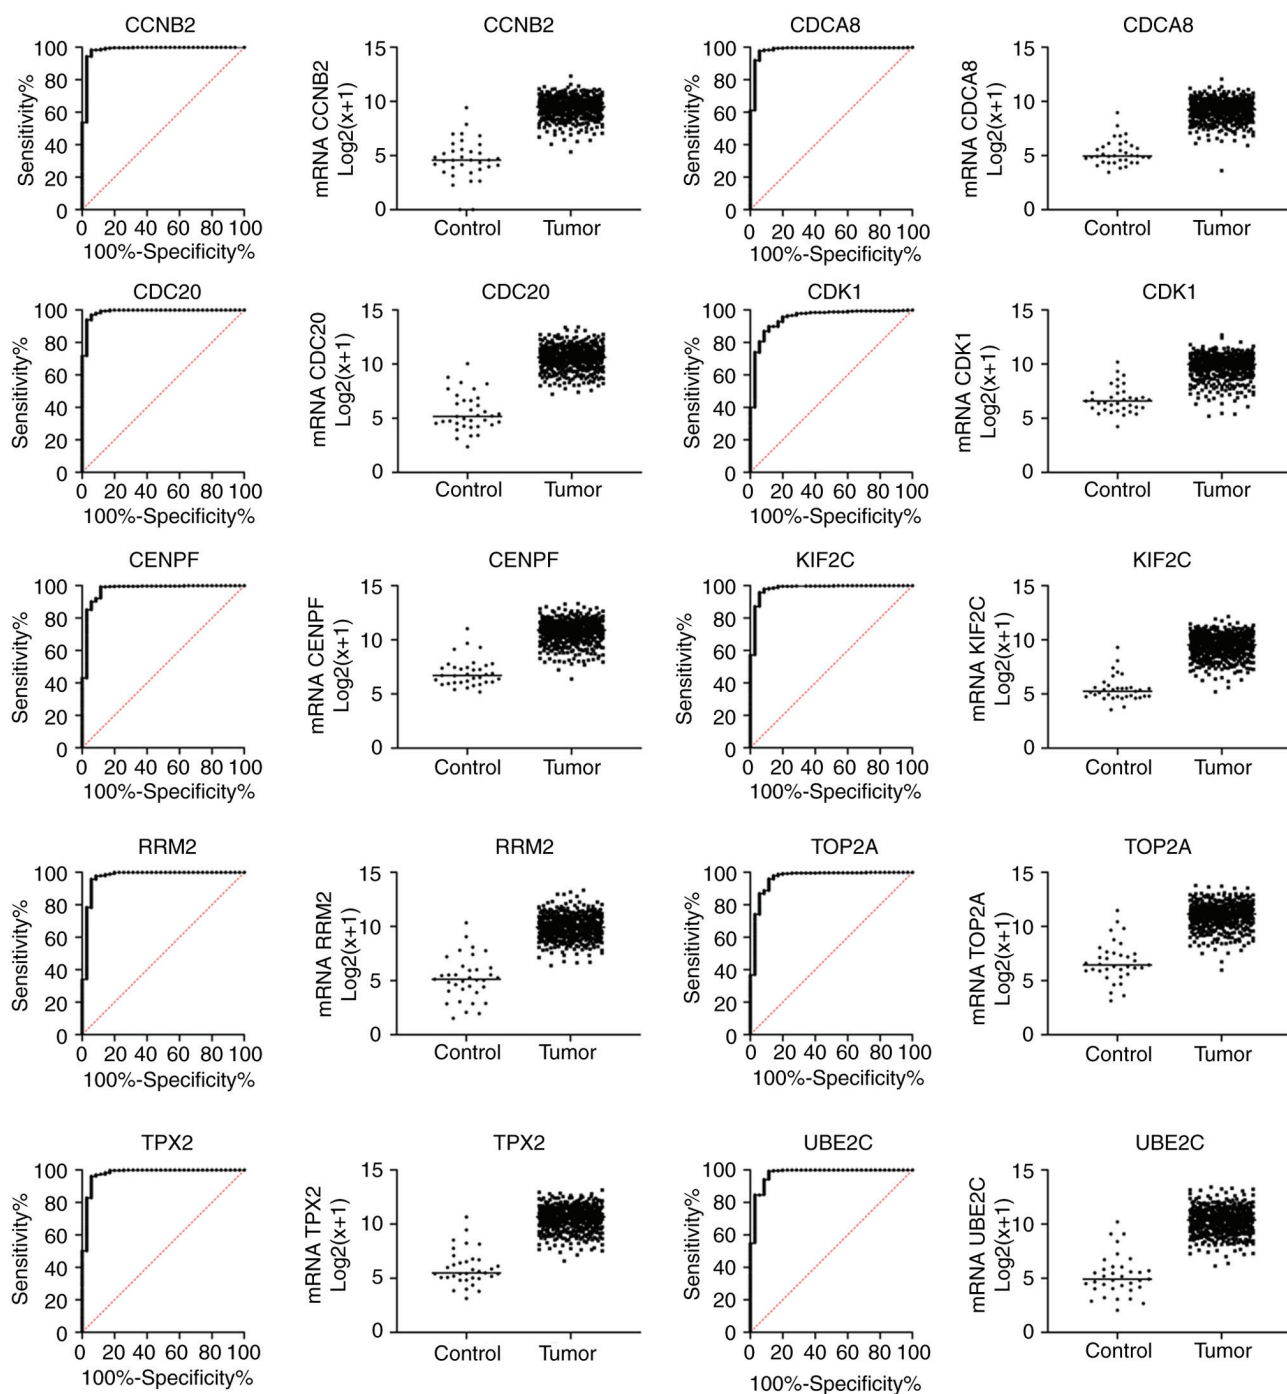

Table SI. Clinicopathological characteristics of the GSE17025 dataset.

| Characteristic                                           | n  | %     |
|----------------------------------------------------------|----|-------|
| Atrophic endometrium<br>(postmenopausal) (Control group) | 12 |       |
| Tumor stage                                              |    |       |
| I                                                        | 91 | 100   |
| Histology                                                |    |       |
| Endometrioid adenocarcinoma                              | 79 | 86.81 |
| Papillary serous                                         | 12 | 13.19 |
| Histological grade                                       |    |       |
| Grade 1                                                  | 30 | 32.97 |
| Grade 2                                                  | 36 | 39.56 |
| Grade 3                                                  | 25 | 27.47 |
| Myometrial invasion <sup>a</sup>                         |    |       |
| Superficial (<50%)                                       | 67 | 74.44 |
| Deep (>50%)                                              | 23 | 25.56 |

<sup>a</sup>Myometrial invasion information was available for 90 of 91 tumor samples.

Table SII. Clinicopathological characteristics of The Cancer Genome Atlas Uterine Corpus Endometrioid Cancer dataset.

| Characteristic                       | n   | %      |
|--------------------------------------|-----|--------|
| Solid tissue normal<br>Tumor samples | 16  |        |
| Stage <sup>a</sup>                   |     |        |
| I                                    | 226 | 68.278 |
| II                                   | 19  | 5.740  |
| III                                  | 70  | 21.148 |
| IV                                   | 16  | 4.834  |
| Histology                            |     |        |
| Endometrioid                         | 271 | 81.381 |
| Mixed                                | 10  | 3.003  |
| Serous                               | 52  | 15.616 |
| Histological grade                   |     |        |
| Grade 1                              | 78  | 23.423 |
| Grade 2                              | 91  | 27.327 |
| Grade 3                              | 164 | 49.249 |
| Molecular subtype <sup>b</sup>       |     |        |
| POLE                                 | 17  | 7.328  |
| MSI                                  | 65  | 28.017 |
| CN Low                               | 90  | 38.793 |
| CN High                              | 60  | 25.862 |

CN, copy number; MSI, microsatellite instability; POLE, DNA polymerase  $\epsilon$ . <sup>a</sup>Stage information was available for 331 of 333 tumor samples; <sup>b</sup>Molecular subtype information was available for 232 of 333 tumor samples.

Table SIII. Clinicopathological parameters of endometrial cancer tissue samples.

| Patient code | FIGO stage | % MI | Grade | Risk group   |
|--------------|------------|------|-------|--------------|
| T1           | IA         | <50  | 1     | Low          |
| T2           | IA         | <50  | 2     | Low          |
| T3           | IA         | <50  | 2     | Low          |
| T4           | IA         | <50  | 2     | Low          |
| T5           | IA         | <50  | 2     | Low          |
| T6           | IA         | <50  | 2     | Low          |
| T7           | IA         | <50  | 2     | Low          |
| T8           | IA         | <50  | 3     | Intermediate |
| T9           | IA         | <50  | 3     | Intermediate |
| T10          | IA         | <50  | 1     | Low          |
| T11          | IA         | <50  | 1     | Low          |
| T12          | IA         | <50  | 1     | Low          |
| T13          | IA         | <50  | 2     | Low          |
| T14          | IA         | <50  | 2     | Low          |
| T15          | IA         | <50  | 2     | Low          |
| T16          | IA         | <50  | 2     | Low          |
| T17          | IA         | <50  | 2     | Low          |
| T18          | IA         | <50  | 2     | Low          |
| T19          | IA         | <50  | 2     | Low          |
| T20          | IA         | <50  | 3     | Intermediate |
| T21          | IA         | <50  | 3     | Intermediate |
| T22          | IB         | >50  | 2     | Intermediate |
| T23          | IB         | >50  | 2     | Intermediate |
| T24          | IB         | >50  | 2     | Intermediate |
| T25          | IB         | >50  | 2     | Intermediate |
| T26          | IB         | >50  | 2     | Intermediate |
| T27          | IB         | >50  | 2     | Intermediate |
| T28          | IB         | >50  | 2     | Intermediate |
| T29          | IB         | >50  | 3     | High         |
| T30          | IB         | >50  | 3     | High         |
| T31          | IB         | >50  | 3     | High         |
| T32          | IB         | >50  | 2     | Intermediate |
| T33          | IB         | >50  | 3     | High         |
| T34          | II         | >50  | 2     | High         |
| T35          | II         | >50  | 1     | High         |
| T36          | II         | >50  | 2     | High         |
| T37          | II         | >50  | 3     | High         |
| T38          | II         | >50  | 3     | High         |
| T39          | II         | >50  | 3     | High         |
| T40          | IIIA       | >50  | 3     | High         |
| T41          | IIIC       | >50  | 3     | High         |
| T42          | IIIC       | >50  | 3     | High         |

FIGO, International Federation of Gynecology and Obstetrics; MI, myometrial invasion.

Table SIV. Endometrial cancer-associated genes identified using DisGeNET.

| Gene            | Gene name                                                   |
|-----------------|-------------------------------------------------------------|
| <i>AATF</i>     | Apoptosis antagonizing transcription factor                 |
| <i>ABCB1</i>    | ATP binding cassette subfamily B member 1                   |
| <i>ABCC1</i>    | ATP binding cassette subfamily C member 1                   |
| <i>ABCC9</i>    | ATP binding cassette subfamily C member 9                   |
| <i>ABCF2</i>    | ATP binding cassette subfamily F member 2                   |
| <i>ACE</i>      | Angiotensin I converting enzyme                             |
| <i>ACKR3</i>    | Atypical chemokine receptor 3                               |
| <i>ACP1</i>     | Acid phosphatase 1, soluble                                 |
| <i>ACTB</i>     | Actin beta                                                  |
| <i>ADAMTS1</i>  | ADAM metalloproteinase with thrombospondin type 1 motif 1   |
| <i>ADH7</i>     | Alcohol dehydrogenase 7 (class IV), mu or sigma polypeptide |
| <i>ADIPOQ</i>   | Adiponectin, C1Q and collagen domain containing             |
| <i>ADIPOR1</i>  | Adiponectin receptor 1                                      |
| <i>ADIPOR2</i>  | Adiponectin receptor 2                                      |
| <i>ADM</i>      | Adrenomedullin                                              |
| <i>ADRB3</i>    | Adrenoceptor beta 3                                         |
| <i>AFDN</i>     | Afadin, adherens junction formation factor                  |
| <i>AGA</i>      | Aspartylglucosaminidase                                     |
| <i>AGPAT2</i>   | 1-acylglycerol-3-phosphate O-acyltransferase 2              |
| <i>AGT</i>      | Angiotensinogen                                             |
| <i>AGTR1</i>    | Angiotensin II receptor type 1                              |
| <i>AHR</i>      | Aryl hydrocarbon receptor                                   |
| <i>AKR1B1</i>   | Aldo-keto reductase family 1 member B                       |
| <i>AKR1B10</i>  | Aldo-keto reductase family 1 member B10                     |
| <i>AKR1C1</i>   | Aldo-keto reductase family 1 member C1                      |
| <i>AKR1C3</i>   | Aldo-keto reductase family 1 member C3                      |
| <i>AKT1</i>     | AKT serine/threonine kinase 1                               |
| <i>AKT2</i>     | AKT serine/threonine kinase 2                               |
| <i>ALK</i>      | Anaplastic lymphoma receptor tyrosine kinase                |
| <i>AMH</i>      | Anti-Mullerian hormone                                      |
| <i>AMHR2</i>    | Anti-Mullerian hormone receptor type 2                      |
| <i>ANG</i>      | Angiogenin                                                  |
| <i>ANGPT2</i>   | Angiopoietin 2                                              |
| <i>ANXA2</i>    | Annexin A2                                                  |
| <i>ANXA5</i>    | Annexin A5                                                  |
| <i>APBB3</i>    | Amyloid beta precursor protein binding family B member 3    |
| <i>APC</i>      | APC, WNT signaling pathway regulator                        |
| <i>APEX1</i>    | Apurinic/apyrimidinic endodeoxyribonuclease 1               |
| <i>APOE</i>     | Apolipoprotein E                                            |
| <i>APRT</i>     | Adenine phosphoribosyltransferase                           |
| <i>AQP1</i>     | Aquaporin 1 (Colton blood group)                            |
| <i>AQP2</i>     | Aquaporin 2                                                 |
| <i>AR</i>       | Androgen receptor                                           |
| <i>ARHGAP24</i> | Rho GTPase activating protein 24                            |
| <i>ARID1A</i>   | AT-rich interaction domain 1A                               |
| <i>ARMC3</i>    | Armadillo repeat containing 3                               |
| <i>ARRB1</i>    | Arrestin beta 1                                             |
| <i>ASCL2</i>    | Achaete-scute family bHLH transcription factor 2            |
| <i>ATAD2</i>    | ATPase family, AAA domain containing 2                      |
| <i>ATM</i>      | ATM serine/threonine kinase                                 |

Table SIV. Continued.

| Gene             | Gene name                                                                        |
|------------------|----------------------------------------------------------------------------------|
| <i>ATN1</i>      | Atrophin 1                                                                       |
| <i>ATR</i>       | ATR serine/threonine kinase                                                      |
| <i>AURKA</i>     | Aurora kinase A                                                                  |
| <i>AURKB</i>     | Aurora kinase B                                                                  |
| <i>BAAT</i>      | Bile acid-CoA:amino acid N-acyltransferase                                       |
| <i>BAD</i>       | BCL2 associated agonist of cell death                                            |
| <i>BARD1</i>     | BRCA1 associated RING domain 1                                                   |
| <i>BAX</i>       | BCL2 associated X, apoptosis regulator                                           |
| <i>BBS2</i>      | Bardet-Biedl syndrome 2                                                          |
| <i>BCL10</i>     | B-cell CLL/lymphoma 10                                                           |
| <i>BCL2</i>      | BCL2, apoptosis regulator                                                        |
| <i>BCOR</i>      | BCL6 corepressor                                                                 |
| <i>BDNF</i>      | Brain derived neurotrophic factor                                                |
| <i>BGN</i>       | Biglycan                                                                         |
| <i>BHD</i>       | Beukes familial hip dysplasia                                                    |
| <i>BHLHE41</i>   | Basic helix-loop-helix family member e41                                         |
| <i>BIRC2</i>     | Baculoviral IAP repeat containing 2                                              |
| <i>BIRC3</i>     | Baculoviral IAP repeat containing 3                                              |
| <i>BIRC5</i>     | Baculoviral IAP repeat containing 5                                              |
| <i>BIRC5</i>     | Baculoviral IAP repeat containing 5                                              |
| <i>BMI1</i>      | BMI1 proto-oncogene, polycomb ring finger                                        |
| <i>BRAF</i>      | B-Raf proto-oncogene, serine/threonine kinase                                    |
| <i>BRCA1</i>     | BRCA1, DNA repair associated                                                     |
| <i>BRCA2</i>     | BRCA2, DNA repair associated                                                     |
| <i>BRD2</i>      | Bromodomain containing 2                                                         |
| <i>BRD7</i>      | Bromodomain containing 7                                                         |
| <i>BST2</i>      | Bone marrow stromal cell antigen 2                                               |
| <i>BUB1B</i>     | BUB1 mitotic checkpoint serine/threonine kinase B                                |
| <i>C10orf67</i>  | Chromosome 10 open reading frame 67                                              |
| <i>C19orf33</i>  | Chromosome 19 open reading frame 33                                              |
| <i>C1GALT1C1</i> | C1GALT1 specific chaperone 1                                                     |
| <i>C1QB</i>      | Complement C1q binding protein                                                   |
| <i>C21orf33</i>  | Chromosome 21 open reading frame 33                                              |
| <i>CA2</i>       | Carbonic anhydrase 2                                                             |
| <i>CABLES1</i>   | Cdk5 and Abl enzyme substrate 1                                                  |
| <i>CACUL1</i>    | CDK2 associated cullin domain 1                                                  |
| <i>CAD</i>       | Carbamoyl-phosphate synthetase 2, aspartate transcarbamylase, and dihydroorotase |
| <i>CADMI</i>     | Cell adhesion molecule 1                                                         |
| <i>CALB1</i>     | Calbindin 1                                                                      |
| <i>CALD1</i>     | Caldesmon 1                                                                      |
| <i>CAPN9</i>     | Calpain 9                                                                        |
| <i>CASC2</i>     | Cancer susceptibility 2 (non-protein coding)                                     |
| <i>CASP3</i>     | Caspase 3                                                                        |
| <i>CASP7</i>     | Caspase 7                                                                        |
| <i>CASP8</i>     | Caspase 8                                                                        |
| <i>CAT</i>       | Catalase                                                                         |
| <i>CAV1</i>      | Caveolin 1                                                                       |
| <i>CCDC54</i>    | Coiled-coil domain containing 54                                                 |
| <i>CCL2</i>      | C-C motif chemokine ligand 2                                                     |
| <i>CCL20</i>     | C-C motif chemokine ligand 20                                                    |
| <i>CCL28</i>     | C-C motif chemokine ligand 28                                                    |
| <i>CCNA2</i>     | Cyclin A2                                                                        |
| <i>CCNB1</i>     | Cyclin B1                                                                        |
| <i>CCND1</i>     | Cyclin D1                                                                        |
| <i>CCND3</i>     | Cyclin D3                                                                        |

Table SIV. Continued.

| Gene              | Gene name                                                 |
|-------------------|-----------------------------------------------------------|
| <i>CCNE1</i>      | Cyclin E1                                                 |
| <i>CCR6</i>       | C-C motif chemokine receptor 6                            |
| <i>CCR7</i>       | C-C motif chemokine receptor 7                            |
| <i>CD163</i>      | CD163 molecule                                            |
| <i>CD24</i>       | CD24 molecule                                             |
| <i>CD274</i>      | CD274 molecule                                            |
| <i>CD38</i>       | CD38 molecule                                             |
| <i>CD44</i>       | CD44 molecule (Indian blood group)                        |
| <i>CD68</i>       | CD68 molecule                                             |
| <i>CD82</i>       | CD82 molecule                                             |
| <i>CD9</i>        | CD9 molecule                                              |
| <i>CDC25B</i>     | Cell division cycle 25B                                   |
| <i>CDC25C</i>     | Cell division cycle 25C                                   |
| <i>CDC42SE2</i>   | CDC42 small effector 2                                    |
| <i>CDH1</i>       | Cadherin 1                                                |
| <i>CDH13</i>      | Cadherin 13                                               |
| <i>CDK2</i>       | Cyclin dependent kinase 2                                 |
| <i>CDK4</i>       | Cyclin dependent kinase 4                                 |
| <i>CDK6</i>       | Cyclin dependent kinase 6                                 |
| <i>CDK8</i>       | Cyclin dependent kinase 8                                 |
| <i>CDKN1A</i>     | Cyclin dependent kinase inhibitor 1A                      |
| <i>CDKN1B</i>     | Cyclin dependent kinase inhibitor 1B                      |
| <i>CDKN1C</i>     | Cyclin dependent kinase inhibitor 1C                      |
| <i>CDKN2A</i>     | Cyclin dependent kinase inhibitor 2A                      |
| <i>CDKN2B</i>     | Cyclin dependent kinase inhibitor 2B                      |
| <i>CDKN2B-AS1</i> | CDKN2B antisense RNA 1                                    |
| <i>CDX2</i>       | Caudal type homeobox 2                                    |
| <i>CEACAM1</i>    | Carcinoembryonic antigen related cell adhesion molecule 1 |
| <i>CEACAM3</i>    | Carcinoembryonic antigen related cell adhesion molecule 3 |
| <i>CEACAM5</i>    | Carcinoembryonic antigen related cell adhesion molecule 5 |
| <i>CEACAM7</i>    | Carcinoembryonic antigen related cell adhesion molecule 7 |
| <i>CELP</i>       | Carboxyl ester lipase pseudogene                          |
| <i>CFLAR</i>      | CASP8 and FADD like apoptosis regulator                   |
| <i>CGA</i>        | Glycoprotein hormones, alpha polypeptide                  |
| <i>CGB3</i>       | Chorionic gonadotropin beta subunit 3                     |
| <i>CGB5</i>       | Chorionic gonadotropin beta subunit 5                     |
| <i>CGB8</i>       | Chorionic gonadotropin beta subunit 8                     |
| <i>CGRRF1</i>     | Cell growth regulator with ring finger domain 1           |
| <i>CHD4</i>       | Chromodomain helicase DNA binding protein 4               |
| <i>CHEK1</i>      | Checkpoint kinase 1                                       |
| <i>CHEK2</i>      | Checkpoint kinase 2                                       |
| <i>CHFR</i>       | Checkpoint with forkhead and ring finger domains          |
| <i>CHST3</i>      | Carbohydrate sulfotransferase 3                           |
| <i>CIB1</i>       | Calcium and integrin binding 1                            |
| <i>CIDEA</i>      | Cell death-inducing DFFA-like effector a                  |
| <i>CIRBP</i>      | Cold inducible RNA binding protein                        |
| <i>CLDN1</i>      | Claudin 1                                                 |
| <i>CLDN3</i>      | Claudin 3                                                 |
| <i>CLDN4</i>      | Claudin 4                                                 |
| <i>CLDN7</i>      | Claudin 7                                                 |
| <i>CLU</i>        | Clusterin                                                 |
| <i>COL11A2</i>    | Collagen type XI alpha 2 chain                            |

Table SIV. Continued.

| Gene               | Gene name                                      |
|--------------------|------------------------------------------------|
| <i>COMMD3-BMI1</i> | COMMD3-BMI1 readthrough                        |
| <i>COMT</i>        | Catechol-O-methyltransferase                   |
| <i>COPZ2</i>       | Coatomer protein complex subunit zeta 2        |
| <i>COX1</i>        | Cytochrome c oxidase subunit I                 |
| <i>COX2</i>        | Cytochrome c oxidase subunit II                |
| <i>COX8A</i>       | Cytochrome c oxidase subunit 8A                |
| <i>CRABP1</i>      | Cellular retinoic acid binding protein 1       |
| <i>CREBBP</i>      | CREB binding protein                           |
| <i>CRH</i>         | Corticotropin releasing hormone                |
| <i>CRISP2</i>      | Cysteine rich secretory protein 2              |
| <i>CRP</i>         | C-reactive protein                             |
| <i>CRY1</i>        | Cryptochrome circadian clock 1                 |
| <i>CSF1</i>        | Colony stimulating factor 1                    |
| <i>CSF1R</i>       | Colony stimulating factor 1 receptor           |
| <i>CSF2</i>        | Colony stimulating factor 2                    |
| <i>CSNK2B</i>      | Casein kinase 2 beta                           |
| <i>CTBP2</i>       | C-terminal binding protein 2                   |
| <i>CTCF</i>        | CCCTC-binding factor                           |
| <i>CTCFL</i>       | CCCTC-binding factor like                      |
| <i>CTNNB1</i>      | Catenin beta 1                                 |
| <i>CTNNBIP1</i>    | Catenin beta interacting protein 1             |
| <i>CTNND1</i>      | Catenin delta 1                                |
| <i>CTSD</i>        | Cathepsin D                                    |
| <i>CXADR</i>       | Coxsackie virus and adenovirus receptor        |
| <i>CXCL1</i>       | C-X-C motif chemokine ligand 1                 |
| <i>CXCL10</i>      | C-X-C motif chemokine ligand 10                |
| <i>CXCL11</i>      | C-X-C motif chemokine ligand 11                |
| <i>CXCL12</i>      | C-X-C motif chemokine ligand 12                |
| <i>CXCL2</i>       | C-X-C motif chemokine ligand 2                 |
| <i>CXCL8</i>       | C-X-C motif chemokine ligand 8                 |
| <i>CXCR1</i>       | C-X-C motif chemokine receptor 1               |
| <i>CXCR2</i>       | C-X-C motif chemokine receptor 2               |
| <i>CXCR4</i>       | C-X-C motif chemokine receptor 4               |
| <i>CXorf67</i>     | Chromosome X open reading frame 67             |
| <i>CYP11A1</i>     | Cytochrome P450 family 11 subfamily A member 1 |
| <i>CYP17A1</i>     | Cytochrome P450 family 17 subfamily A member 1 |
| <i>CYP19A1</i>     | Cytochrome P450 family 19 subfamily A member 1 |
| <i>CYP1A1</i>      | Cytochrome P450 family 1 subfamily A member 1  |
| <i>CYP1A2</i>      | Cytochrome P450 family 1 subfamily A member 2  |
| <i>CYP1B1</i>      | Cytochrome P450 family 1 subfamily B member 1  |
| <i>CYP2B6</i>      | Cytochrome P450 family 2 subfamily B member 6  |
| <i>CYP3A4</i>      | Cytochrome P450 family 3 subfamily A member 4  |
| <i>CYP3A7</i>      | Cytochrome P450 family 3 subfamily A member 7  |
| <i>CYP4F3</i>      | Cytochrome P450 family 4 subfamily F member 3  |
| <i>CYR61</i>       | Cysteine rich angiogenic inducer 61            |
| <i>DAB1</i>        | DAB1, reelin adaptor protein                   |
| <i>DAB2</i>        | DAB2, clathrin adaptor protein                 |
| <i>DACH1</i>       | Dachshund family transcription factor 1        |



Table SIV. Continued.

| Gene            | Gene name                                                          |
|-----------------|--------------------------------------------------------------------|
| <i>DAP</i>      | Death associated protein                                           |
| <i>DAPK1</i>    | Death associated protein kinase 1                                  |
| <i>DCC</i>      | DCC netrin 1 receptor                                              |
| <i>DCN</i>      | Decorin                                                            |
| <i>DCTN4</i>    | Dynactin subunit 4                                                 |
| <i>DCTN6</i>    | Dynactin subunit 6                                                 |
| <i>DDIT3</i>    | DNA damage inducible transcript 3                                  |
| <i>DDR1</i>     | Discoidin domain receptor tyrosine kinase 1                        |
| <i>DDT</i>      | D-dopachrome tautomerase                                           |
| <i>DDX3X</i>    | DEAD-box helicase 3, X-linked                                      |
| <i>DDX53</i>    | DEAD-box helicase 53                                               |
| <i>DENND1A</i>  | DENN domain containing 1A                                          |
| <i>DES</i>      | Desmin                                                             |
| <i>DGKA</i>     | Diacylglycerol kinase alpha                                        |
| <i>DICER1</i>   | Dicer 1, ribonuclease III                                          |
| <i>DKK3</i>     | Dickkopf WNT signaling pathway inhibitor 3                         |
| <i>DLL1</i>     | Delta like canonical Notch ligand 1                                |
| <i>DNMT1</i>    | DNA methyltransferase 1                                            |
| <i>DNMT3B</i>   | DNA methyltransferase 3 beta                                       |
| <i>DROSHA</i>   | Drosha ribonuclease III                                            |
| <i>DUSP6</i>    | Dual specificity phosphatase 6                                     |
| <i>DYNLL2</i>   | Dynein light chain LC8-type 2                                      |
| <i>EBAG9</i>    | Estrogen receptor binding site associated, antigen, 9              |
| <i>EDN1</i>     | Endothelin 1                                                       |
| <i>EDNRB</i>    | Endothelin receptor type B                                         |
| <i>EEC1</i>     | Ectrodactyly, ectodermal dysplasia and cleft lip/palate syndrome 1 |
| <i>EFEMP1</i>   | EGF containing fibulin like extracellular matrix protein 1         |
| <i>EFNA2</i>    | Ephrin A2                                                          |
| <i>EGF</i>      | Epidermal growth factor                                            |
| <i>EGFR</i>     | Epidermal growth factor receptor                                   |
| <i>EGLN1</i>    | Egl-9 family hypoxia inducible factor 1                            |
| <i>EGR1</i>     | Early growth response 1                                            |
| <i>EIF4E</i>    | Eukaryotic translation initiation factor 4E                        |
| <i>EIF4EBP1</i> | Eukaryotic translation initiation factor 4E binding protein 1      |
| <i>ELAVL2</i>   | ELAV like RNA binding protein 2                                    |
| <i>ELF1</i>     | E74 like ETS transcription factor 1                                |
| <i>ELOF1</i>    | Elongation factor 1 homolog                                        |
| <i>EMP2</i>     | Epithelial membrane protein 2                                      |
| <i>ENG</i>      | Endoglin                                                           |
| <i>ENO1</i>     | Enolase 1                                                          |
| <i>ENOSF1</i>   | Enolase superfamily member 1                                       |
| <i>ENTPD1</i>   | Ectonucleoside triphosphate diphosphohydrolase 1                   |
| <i>EP300</i>    | E1A binding protein p300                                           |
| <i>EPC1</i>     | Enhancer of polycomb homolog 1                                     |
| <i>EPCAM</i>    | Epithelial cell adhesion molecule                                  |
| <i>EPHA2</i>    | EPH receptor A2                                                    |
| <i>EPHA8</i>    | EPH receptor A8                                                    |
| <i>EPHB2</i>    | EPH receptor B2                                                    |
| <i>EPHB4</i>    | EPH receptor B4                                                    |
| <i>EPO</i>      | Erythropoietin                                                     |
| <i>EPOR</i>     | Erythropoietin receptor                                            |
| <i>ERAP1</i>    | Endoplasmic reticulum aminopeptidase 1                             |
| <i>ERBB2</i>    | Erb-b2 receptor tyrosine kinase 2                                  |
| <i>ERBB3</i>    | Erb-b2 receptor tyrosine kinase 3                                  |

Table SIV. Continued.

| Gene           | Gene name                                                   |
|----------------|-------------------------------------------------------------|
| <i>ERCC1</i>   | ERCC excision repair 1, endonuclease non-catalytic subunit  |
| <i>ERCC2</i>   | ERCC excision repair 2, TFIIH core complex helicase subunit |
| <i>ERCC4</i>   | ERCC excision repair 4, endonuclease catalytic subunit      |
| <i>ERCC5</i>   | ERCC excision repair 5, endonuclease                        |
| <i>ERRF1</i>   | ERBB receptor feedback inhibitor 1                          |
| <i>ERV3-1</i>  | Endogenous retrovirus group 3 member 1                      |
| <i>ERVK-18</i> | Endogenous retrovirus group K member 18                     |
| <i>ERVK-20</i> | Endogenous retrovirus group K member 20                     |
| <i>ERVV-2</i>  | Endogenous retrovirus group V member 2                      |
| <i>ERVW-1</i>  | Endogenous retrovirus group W member 1                      |
| <i>ESR1</i>    | Estrogen receptor 1                                         |
| <i>ESR2</i>    | Estrogen receptor 2                                         |
| <i>ESRRA</i>   | Estrogen related receptor alpha                             |
| <i>ESRRB</i>   | Estrogen related receptor beta                              |
| <i>ETS1</i>    | ETS proto-oncogene 1, transcription factor                  |
| <i>ETV5</i>    | ETS variant 5                                               |
| <i>EZH2</i>    | Enhancer of zeste 2 polycomb repressive complex 2 subunit   |
| <i>EZR</i>     | Ezrin                                                       |
| <i>F2R</i>     | Coagulation factor II thrombin receptor                     |
| <i>F2RL1</i>   | F2R like trypsin receptor 1                                 |
| <i>F2RL3</i>   | F2R like thrombin/trypsin receptor 3                        |
| <i>FABP5</i>   | Fatty acid binding protein 5                                |
| <i>FANCD2</i>  | Fanconi anemia complementation group D2                     |
| <i>FAS</i>     | Fas cell surface death receptor                             |
| <i>FAS-AS1</i> | FAS antisense RNA 1                                         |
| <i>FASLG</i>   | Fas ligand                                                  |
| <i>FASN</i>    | Fatty acid synthase                                         |
| <i>FBXW7</i>   | F-box and WD repeat domain containing 7                     |
| <i>FEN1</i>    | Flap structure-specific endonuclease 1                      |
| <i>FES</i>     | FES proto-oncogene, tyrosine kinase                         |
| <i>FGF1</i>    | Fibroblast growth factor 1                                  |
| <i>FGF10</i>   | Fibroblast growth factor 10                                 |
| <i>FGF13</i>   | Fibroblast growth factor 13                                 |
| <i>FGF2</i>    | Fibroblast growth factor 2                                  |
| <i>FGF3</i>    | Fibroblast growth factor 3                                  |
| <i>FGF4</i>    | Fibroblast growth factor 4                                  |
| <i>FGF7</i>    | Fibroblast growth factor 7                                  |
| <i>FGF9</i>    | Fibroblast growth factor 9                                  |
| <i>FGFR2</i>   | Fibroblast growth factor receptor 2                         |
| <i>FGFR4</i>   | Fibroblast growth factor receptor 4                         |
| <i>FHIT</i>    | Fragile histidine triad                                     |
| <i>FLT4</i>    | Fms related tyrosine kinase 4                               |
| <i>FOS</i>     | Fos proto-oncogene, AP-1 transcription factor subunit       |
| <i>FOSL2</i>   | FOS like 2, AP-1 transcription factor subunit               |
| <i>FOXA1</i>   | Forkhead box A1                                             |
| <i>FOXC1</i>   | Forkhead box C1                                             |
| <i>FOXD3</i>   | Forkhead box D3                                             |
| <i>FOXO1</i>   | Forkhead box O1                                             |
| <i>FOXP3</i>   | Forkhead box P3                                             |
| <i>FSD1</i>    | Fibronectin type III and SPRY domain containing 1           |
| <i>FSD1L</i>   | Fibronectin type III and SPRY domain containing 1 like      |
| <i>FST</i>     | Follistatin                                                 |

Table SIV. Continued.

| Gene           | Gene name                                             |
|----------------|-------------------------------------------------------|
| <i>FSTL1</i>   | Follistatin like 1                                    |
| <i>FTO</i>     | FTO, alpha-ketoglutarate dependent dioxygenase        |
| <i>FUT4</i>    | Fucosyltransferase 4                                  |
| <i>GABPA</i>   | GA binding protein transcription factor alpha subunit |
| <i>GAS5</i>    | Growth arrest specific 5 (non-protein coding)         |
| <i>GAS6</i>    | Growth arrest specific 6                              |
| <i>GATA4</i>   | GATA binding protein 4                                |
| <i>GGN</i>     | Gametogenetin                                         |
| <i>GGT1</i>    | Gamma-glutamyltransferase 1                           |
| <i>GGT2</i>    | Gamma-glutamyltransferase 2                           |
| <i>GGTLC3</i>  | Gamma-glutamyltransferase light chain 3               |
| <i>GGTLC4P</i> | Gamma-glutamyltransferase light chain 4 pseudogene    |
| <i>GGTLC5P</i> | Gamma-glutamyltransferase light chain 5 pseudogene    |
| <i>GHI</i>     | Growth hormone 1                                      |
| <i>GHRH</i>    | Growth hormone releasing hormone                      |
| <i>GHRHR</i>   | Growth hormone releasing hormone receptor             |
| <i>GHSR</i>    | Growth hormone secretagogue receptor                  |
| <i>GJB1</i>    | Gap junction protein beta 1                           |
| <i>GJB2</i>    | Gap junction protein beta 2                           |
| <i>GLI1</i>    | GLI family zinc finger 1                              |
| <i>GLYAT</i>   | Glycine-N-acyltransferase                             |
| <i>GNRH1</i>   | Gonadotropin releasing hormone 1                      |
| <i>GNRH2</i>   | Gonadotropin releasing hormone 2                      |
| <i>GNRHR</i>   | Gonadotropin releasing hormone receptor               |
| <i>GORASP2</i> | Golgi reassembly stacking protein 2                   |
| <i>GPBAR1</i>  | G protein-coupled bile acid receptor 1                |
| <i>GPCPD1</i>  | Glycerophosphocholine phosphodiesterase 1             |
| <i>GPERR1</i>  | G protein-coupled estrogen receptor 1                 |
| <i>GPI</i>     | Glucose-6-phosphate isomerase                         |
| <i>GPRC5A</i>  | G protein-coupled receptor class C group 5 member A   |
| <i>GRP</i>     | Gastrin releasing peptide                             |
| <i>GSTM1</i>   | Glutathione S-transferase mu 1                        |
| <i>GSTP1</i>   | Glutathione S-transferase pi 1                        |
| <i>GSTT1</i>   | Glutathione S-transferase theta 1                     |
| <i>GSTZ1</i>   | Glutathione S-transferase zeta 1                      |
| <i>GTF2H1</i>  | General transcription factor IIH subunit 1            |
| <i>GZMA</i>    | Granzyme A                                            |
| <i>H2AFX</i>   | H2A histone family member X                           |
| <i>HAAO</i>    | 3-hydroxyanthranilate 3,4-dioxygenase                 |
| <i>HAND2</i>   | Heart and neural crest derivatives expressed 2        |
| <i>HAS1</i>    | Hyaluronan synthase 1                                 |
| <i>HCRT</i>    | Hypocretin neuropeptide precursor                     |
| <i>HDAC1</i>   | Histone deacetylase 1                                 |
| <i>HDAC2</i>   | Histone deacetylase 2                                 |
| <i>HDAC9</i>   | Histone deacetylase 9                                 |
| <i>HES1</i>    | Hes family bHLH transcription factor 1                |
| <i>HFE</i>     | Hemochromatosis                                       |
| <i>HGF</i>     | Hepatocyte growth factor                              |
| <i>HHEX</i>    | Hematopoietically expressed homeobox                  |
| <i>HIF1A</i>   | Hypoxia inducible factor 1 alpha subunit              |
| <i>HMGN5</i>   | High mobility group nucleosome binding domain 5       |
| <i>HMMR</i>    | Hyaluronan mediated motility receptor                 |
| <i>HNF1B</i>   | HNF1 homeobox B                                       |

Table SIV. Continued.

| Gene            | Gene name                                                                    |
|-----------------|------------------------------------------------------------------------------|
| <i>HNF4A</i>    | Hepatocyte nuclear factor 4 alpha                                            |
| <i>HOTAIR</i>   | HOX transcript antisense RNA                                                 |
| <i>HOXA10</i>   | Homeobox A10                                                                 |
| <i>HOXA11</i>   | Homeobox A11                                                                 |
| <i>HOXB13</i>   | Homeobox B13                                                                 |
| <i>HPGDS</i>    | Hematopoietic prostaglandin D synthase                                       |
| <i>HPR</i>      | Haptoglobin-related protein                                                  |
| <i>HPSE</i>     | Heparanase                                                                   |
| <i>HRAS</i>     | HRas proto-oncogene, GTPase                                                  |
| <i>HSD17B1</i>  | Hydroxysteroid 17-beta dehydrogenase 1                                       |
| <i>HSD17B2</i>  | Hydroxysteroid 17-beta dehydrogenase 2                                       |
| <i>HSD17B4</i>  | Hydroxysteroid 17-beta dehydrogenase 4                                       |
| <i>HSD17B6</i>  | Hydroxysteroid 17-beta dehydrogenase 6                                       |
| <i>HSD17B7</i>  | Hydroxysteroid 17-beta dehydrogenase 7                                       |
| <i>HSD3B1</i>   | Hydroxy-delta-5-steroid dehydrogenase, 3 beta- and steroid delta-isomerase 1 |
| <i>HSD3B2</i>   | Hydroxy-delta-5-steroid dehydrogenase, 3 beta- and steroid delta-isomerase 2 |
| <i>HSF1</i>     | Heat shock transcription factor 1                                            |
| <i>HSP90AA1</i> | Heat shock protein 90 alpha family class A member 1                          |
| <i>HSPA5</i>    | Heat shock protein family A (Hsp70) member 5                                 |
| <i>HSPB3</i>    | Heat shock protein family B (small) member 3                                 |
| <i>HSPE1</i>    | Heat shock protein family E (Hsp10) member 1                                 |
| <i>HTC2</i>     | Hypertrichosis 2 (generalized, congenital)                                   |
| <i>HTR1B</i>    | 5-hydroxytryptamine receptor 1B                                              |
| <i>HTRA1</i>    | HtrA serine peptidase 1                                                      |
| <i>HTRA2</i>    | HtrA serine peptidase 2                                                      |
| <i>HTRA3</i>    | HtrA serine peptidase 3                                                      |
| <i>HYAL1</i>    | Hyaluronoglucosaminidase 1                                                   |
| <i>HYAL2</i>    | Hyaluronoglucosaminidase 2                                                   |
| <i>HYAL3</i>    | Hyaluronoglucosaminidase 3                                                   |
| <i>IFI27</i>    | Interferon alpha inducible protein 27                                        |
| <i>IFITM1</i>   | Interferon induced transmembrane protein 1                                   |
| <i>IFNB1</i>    | Interferon beta 1                                                            |
| <i>IFNG</i>     | Interferon gamma                                                             |
| <i>IGF1</i>     | Insulin like growth factor 1                                                 |
| <i>IGF1R</i>    | Insulin like growth factor 1 receptor                                        |
| <i>IGF2</i>     | Insulin like growth factor 2                                                 |
| <i>IGF2BP3</i>  | Insulin like growth factor 2 mRNA Binding protein 3                          |
| <i>IGF2R</i>    | Insulin like growth factor 2 receptor                                        |
| <i>IGFBP1</i>   | Insulin like growth factor binding protein 1                                 |
| <i>IGFBP2</i>   | Insulin like growth factor binding protein 2                                 |
| <i>IGFBP3</i>   | Insulin like growth factor binding protein 3                                 |
| <i>IGFBP5</i>   | Insulin like growth factor binding protein 5                                 |
| <i>IGFBP6</i>   | Insulin like growth factor binding protein 6                                 |
| <i>IGFBP7</i>   | Insulin like growth factor binding protein 7                                 |
| <i>IL11</i>     | Interleukin 11                                                               |
| <i>IL13</i>     | Interleukin 13                                                               |
| <i>IL17A</i>    | Interleukin 17A                                                              |
| <i>IL1A</i>     | Interleukin 1 alpha                                                          |
| <i>IL1B</i>     | Interleukin 1 beta                                                           |
| <i>IL1RN</i>    | Interleukin 1 receptor antagonist                                            |
| <i>IL32</i>     | Interleukin 32                                                               |
| <i>IL6</i>      | Interleukin 6                                                                |

Table SIV. Continued.

| Gene            | Gene name                                                          |
|-----------------|--------------------------------------------------------------------|
| <i>IL6R</i>     | Interleukin 6 receptor                                             |
| <i>IL6ST</i>    | Interleukin 6 signal transducer                                    |
| <i>INHA</i>     | Inhibin alpha subunit                                              |
| <i>INHBA</i>    | Inhibin beta A subunit                                             |
| <i>INHBB</i>    | Inhibin beta B subunit                                             |
| <i>INHBE</i>    | Inhibin beta E subunit                                             |
| <i>INSR</i>     | Insulin receptor                                                   |
| <i>INTS2</i>    | Integrator complex subunit 2                                       |
| <i>IPO8</i>     | Importin 8                                                         |
| <i>IRS1</i>     | Insulin receptor substrate 1                                       |
| <i>IRS2</i>     | Insulin receptor substrate 2                                       |
| <i>ITGA4</i>    | Integrin subunit alpha 4                                           |
| <i>ITGB1</i>    | Integrin subunit beta 1                                            |
| <i>ITK</i>      | IL2 inducible T-cell kinase                                        |
| <i>JAG1</i>     | Jagged 1                                                           |
| <i>JAK1</i>     | Janus kinase 1                                                     |
| <i>JAZF1</i>    | JAZF zinc finger 1                                                 |
| <i>JPH4</i>     | Junctophilin 4                                                     |
| <i>JUN</i>      | Jun proto-oncogene, AP-1 transcription factor subunit              |
| <i>JUP</i>      | Junction plakoglobin                                               |
| <i>KCNH2</i>    | Potassium voltage-gated channel subfamily H member 2               |
| <i>KCNH6</i>    | Potassium voltage-gated channel subfamily H member 6               |
| <i>KCNMA1</i>   | Potassium calcium-activated channel subfamily M alpha 1            |
| <i>KCNN4</i>    | Potassium calcium-activated channel subfamily N member 4           |
| <i>KDM4A</i>    | Lysine demethylase 4A                                              |
| <i>KDM4B</i>    | Lysine demethylase 4B                                              |
| <i>KDR</i>      | Kinase insert domain receptor                                      |
| <i>KHDRBS1</i>  | KH RNA binding domain containing, signal transduction associated 1 |
| <i>KIAA1324</i> | KIAA1324                                                           |
| <i>KISS1</i>    | KiSS-1 metastasis-suppressor                                       |
| <i>KISS1R</i>   | KISS1 receptor                                                     |
| <i>KIT</i>      | KIT proto-oncogene receptor tyrosine kinase                        |
| <i>KITLG</i>    | KIT ligand                                                         |
| <i>KLF9</i>     | Kruppel like factor 9                                              |
| <i>KLK4</i>     | Kallikrein related peptidase 4                                     |
| <i>KLK8</i>     | Kallikrein related peptidase 8                                     |
| <i>LLN</i>      | Killin, p53-regulated DNA replication inhibitor                    |
| <i>KRAS</i>     | KRAS proto-oncogene, GTPase                                        |
| <i>KRT19</i>    | Keratin 19                                                         |
| <i>KRT20</i>    | Keratin 20                                                         |
| <i>LICAM</i>    | L1 cell adhesion molecule                                          |
| <i>LAMC1</i>    | Laminin subunit gamma 1                                            |
| <i>LBX1</i>     | Ladybird homeobox 1                                                |
| <i>LCN2</i>     | Lipocalin 2                                                        |
| <i>LEF1</i>     | Lymphoid enhancer binding factor 1                                 |
| <i>LEP</i>      | Leptin                                                             |
| <i>LEPR</i>     | Leptin receptor                                                    |
| <i>LGR6</i>     | Leucine rich repeat containing G protein-coupled receptor 6        |
| <i>LHCGR</i>    | Luteinizing hormone/choriogonadotropin receptor                    |
| <i>LIF</i>      | Leukemia inhibitory factor                                         |

Table SIV. Continued.

| Gene                | Gene name                                                                   |
|---------------------|-----------------------------------------------------------------------------|
| <i>LINC-ROR</i>     | Long intergenic non-protein coding RNA, regulator of reprogramming          |
| <i>LLGL1</i>        | LLGL1, scribble cell polarity complex component                             |
| <i>LNPEP</i>        | Leucyl and cystinyl aminopeptidase                                          |
| <i>LOC100128922</i> | Connexin                                                                    |
| <i>LOC102724023</i> | ES1 protein homolog, mitochondrial                                          |
| <i>LPAR2</i>        | Lysophosphatidic acid receptor 2                                            |
| <i>LPP</i>          | LIM domain containing preferred translocation partner in lipoma             |
| <i>LPXN</i>         | Leupaxin                                                                    |
| <i>LRG1</i>         | Leucine rich alpha-2-glycoprotein 1                                         |
| <i>LRP1</i>         | LDL receptor related protein 1                                              |
| <i>LRPPRC</i>       | Leucine rich pentatricopeptide repeat containing                            |
| <i>LTA</i>          | Lymphotoxin alpha                                                           |
| <i>LTF</i>          | Lactotransferrin                                                            |
| <i>LXN</i>          | Latexin                                                                     |
| <i>MACROD1</i>      | MACRO domain containing 1                                                   |
| <i>MAL</i>          | Mal, T-cell differentiation protein                                         |
| <i>MALAT1</i>       | Metastasis associated lung adenocarcinoma transcript 1 (non-protein coding) |
| <i>MAP2K7</i>       | Mitogen-activated protein kinase kinase 7                                   |
| <i>MAP3K1</i>       | Mitogen-activated protein kinase kinase kinase 1                            |
| <i>MAP3K4</i>       | Mitogen-activated protein kinase kinase kinase 4                            |
| <i>MAP3K8</i>       | Mitogen-activated protein kinase kinase kinase 8                            |
| <i>MAPK1</i>        | Mitogen-activated protein kinase 1                                          |
| <i>MAPK3</i>        | Mitogen-activated protein kinase 3                                          |
| <i>MARCH8</i>       | Membrane associated ring-CH-type finger 8                                   |
| <i>MARCKSL1</i>     | MARCKS like 1                                                               |
| <i>MBD2</i>         | Methyl-CpG binding domain protein 2                                         |
| <i>MBTD1</i>        | Mbt domain containing 1                                                     |
| <i>MC4R</i>         | Melanocortin 4 receptor                                                     |
| <i>MCL1</i>         | BCL2 family apoptosis regulator                                             |
| <i>MDK</i>          | Midkine (neurite growth-promoting factor 2)                                 |
| <i>MDM2</i>         | MDM2 proto-oncogene                                                         |
| <i>MDM4</i>         | MDM4, p53 regulator                                                         |
| <i>MEAF6</i>        | MYST/Esa1 associated factor 6                                               |
| <i>MECOM</i>        | MDS1 and EVI1 complex locus                                                 |
| <i>MECP2</i>        | Methyl-CpG binding protein 2                                                |
| <i>MED15</i>        | Mediator complex subunit 15                                                 |
| <i>MET</i>          | MET proto-oncogene, receptor tyrosine kinase                                |
| <i>MGMT</i>         | O-6-methylguanine-DNA methyltransferase                                     |
| <i>MIG7</i>         | Mig-7                                                                       |
| <i>MIR100</i>       | MicroRNA 100                                                                |
| <i>MIR106B</i>      | MicroRNA 106b                                                               |
| <i>MIR124-2</i>     | MicroRNA 124-2                                                              |
| <i>MIR129-2</i>     | MicroRNA 129-2                                                              |
| <i>MIR130B</i>      | MicroRNA 130b                                                               |
| <i>MIR134</i>       | MicroRNA 134                                                                |
| <i>MIR143</i>       | MicroRNA 143                                                                |
| <i>MIR145</i>       | MicroRNA 145                                                                |
| <i>MIR148A</i>      | MicroRNA 148a                                                               |
| <i>MIR152</i>       | MicroRNA 152                                                                |
| <i>MIR155</i>       | MicroRNA 155                                                                |

Table SIV. Continued.

| Gene            | Gene name                                          |
|-----------------|----------------------------------------------------|
| <i>MIR181A2</i> | MicroRNA 181a-2                                    |
| <i>MIR182</i>   | MicroRNA 182                                       |
| <i>MIR193A</i>  | MicroRNA 193a                                      |
| <i>MIR199B</i>  | MicroRNA 199b                                      |
| <i>MIR200B</i>  | MicroRNA 200b                                      |
| <i>MIR200C</i>  | MicroRNA 200c                                      |
| <i>MIR203A</i>  | MicroRNA 203a                                      |
| <i>MIR204</i>   | MicroRNA 204                                       |
| <i>MIR205</i>   | MicroRNA 205                                       |
| <i>MIR206</i>   | MicroRNA 206                                       |
| <i>MIR214</i>   | MicroRNA 214                                       |
| <i>MIR222</i>   | MicroRNA 222                                       |
| <i>MIR26A1</i>  | MicroRNA 26a-1                                     |
| <i>MIR27A</i>   | MicroRNA 27a                                       |
| <i>MIR31</i>    | MicroRNA 31                                        |
| <i>MIR337</i>   | MicroRNA 337                                       |
| <i>MIR34A</i>   | MicroRNA 34a                                       |
| <i>MIR34B</i>   | MicroRNA 34b                                       |
| <i>MIR34C</i>   | MicroRNA 34c                                       |
| <i>MIR372</i>   | MicroRNA 372                                       |
| <i>MIR490</i>   | MicroRNA 490                                       |
| <i>MIR503</i>   | MicroRNA 503                                       |
| <i>MIR505</i>   | MicroRNA 505                                       |
| <i>MIR618</i>   | MicroRNA 618                                       |
| <i>MIR98</i>    | MicroRNA 98                                        |
| <i>MIR99A</i>   | MicroRNA 99a                                       |
| <i>MLH1</i>     | MutL homolog 1                                     |
| <i>MLH3</i>     | MutL homolog 3                                     |
| <i>MME</i>      | Membrane metalloendopeptidase                      |
| <i>MMP1</i>     | Matrix metallopeptidase 1                          |
| <i>MMP13</i>    | Matrix metallopeptidase 13                         |
| <i>MMP14</i>    | Matrix metallopeptidase 14                         |
| <i>MMP2</i>     | Matrix metallopeptidase 2                          |
| <i>MMP26</i>    | Matrix metallopeptidase 26                         |
| <i>MMP3</i>     | Matrix metallopeptidase 3                          |
| <i>MMP7</i>     | Matrix metallopeptidase 7                          |
| <i>MMP9</i>     | Matrix metallopeptidase 9                          |
| <i>MRC1</i>     | Mannose receptor C-type 1                          |
| <i>MRE11</i>    | MRE11 homolog, double strand break repair nuclease |
| <i>MRPL19</i>   | Mitochondrial ribosomal protein L19                |
| <i>MRPL28</i>   | Mitochondrial ribosomal protein L28                |
| <i>MSH2</i>     | MutS homolog 2                                     |
| <i>MSH3</i>     | MutS homolog 3                                     |
| <i>MSH6</i>     | MutS homolog 6                                     |
| <i>MSI1</i>     | Musashi RNA binding protein 1                      |
| <i>MSMB</i>     | Microseminoprotein beta                            |
| <i>MSN</i>      | Moesin                                             |
| <i>MSR1</i>     | Macrophage scavenger receptor 1                    |
| <i>MST1</i>     | Macrophage stimulating 1                           |
| <i>MT1E</i>     | Metallothionein 1E                                 |
| <i>MTA1</i>     | Metastasis associated 1                            |
| <i>MTDH</i>     | Metadherin                                         |
| <i>MTHFR</i>    | Methylenetetrahydrofolate reductase                |
| <i>MTOR</i>     | Mechanistic target of rapamycin                    |
| <i>MUC1</i>     | Mucin 1, cell surface associated                   |
| <i>MUC16</i>    | Mucin 16, cell surface associated                  |
| <i>MUC20</i>    | Mucin 20, cell surface associated                  |
| <i>MUC4</i>     | Mucin 4, cell surface associated                   |

Table SIV. Continued.

| Gene          | Gene name                                                                                      |
|---------------|------------------------------------------------------------------------------------------------|
| <i>MUL1</i>   | Mitochondrial E3 ubiquitin protein ligase 1                                                    |
| <i>MUTYH</i>  | MutY DNA glycosylase                                                                           |
| <i>MVP</i>    | Major vault protein                                                                            |
| <i>MYBL2</i>  | MYB proto-oncogene like 2                                                                      |
| <i>MYC</i>    | V-myc avian myelocytomatosis viral oncogene homolog                                            |
| <i>NBN</i>    | Nibrin                                                                                         |
| <i>NBR1</i>   | NBR1, autophagy cargo receptor                                                                 |
| <i>NCOA1</i>  | Nuclear receptor coactivator 1                                                                 |
| <i>NCOA2</i>  | Nuclear receptor coactivator 2                                                                 |
| <i>NCOA3</i>  | Nuclear receptor coactivator 3                                                                 |
| <i>ND1</i>    | NADH dehydrogenase, subunit 1 (complex I)                                                      |
| <i>ND3</i>    | NADH dehydrogenase, subunit 3 (complex I)                                                      |
| <i>NDC80</i>  | NDC80, kinetochore complex component                                                           |
| <i>NDRG1</i>  | N-myc downstream regulated 1                                                                   |
| <i>NEDD4</i>  | Neural precursor cell expressed, developmentally down-regulated 4, E3 ubiquitin protein ligase |
| <i>NES</i>    | Nestin                                                                                         |
| <i>NEU1</i>   | Neuraminidase 1                                                                                |
| <i>NEURL1</i> | Neuralized E3 ubiquitin protein ligase 1                                                       |
| <i>NFE2L2</i> | Nuclear factor, erythroid 2 like 2                                                             |
| <i>NFKB1</i>  | Nuclear factor kappa B subunit 1                                                               |
| <i>NID1</i>   | Nidogen 1                                                                                      |
| <i>NM</i>     | Neutrophil migration                                                                           |
| <i>NME1</i>   | NME/NM23 nucleoside diphosphate kinase 1                                                       |
| <i>NOD1</i>   | Nucleotide binding oligomerization containing 1                                                |
| <i>NOD2</i>   | Nucleotide binding oligomerization domain containing 2                                         |
| <i>NOS3</i>   | Nitric oxide synthase 3                                                                        |
| <i>NOTCH1</i> | Notch 1                                                                                        |
| <i>NOTCH4</i> | Notch 4                                                                                        |
| <i>NOV</i>    | Nephroblastoma overexpressed                                                                   |
| <i>NPM1</i>   | Nucleophosmin                                                                                  |
| <i>NR0B1</i>  | Nuclear receptor subfamily 0 group B member 1                                                  |
| <i>NR0B2</i>  | Nuclear receptor subfamily 0 group B member 2                                                  |
| <i>NR1H2</i>  | Nuclear receptor subfamily 1 group H member 2                                                  |
| <i>NR1I2</i>  | Nuclear receptor subfamily 1 group I member 2                                                  |
| <i>NR5A1</i>  | Nuclear receptor subfamily 5 group A member 1                                                  |
| <i>NR5A2</i>  | Nuclear receptor subfamily 5 group A member 2                                                  |
| <i>NRIP1</i>  | Nuclear receptor interacting protein 1                                                         |
| <i>NT5E</i>   | 5'-nucleotidase ecto                                                                           |
| <i>NTN1</i>   | Netrin 1                                                                                       |
| <i>NTRK2</i>  | Neurotrophic receptor tyrosine kinase 2                                                        |
| <i>NUP62</i>  | Nucleoporin 62                                                                                 |
| <i>NUPR1</i>  | Nuclear protein 1, transcriptional regulator                                                   |
| <i>NUTM2A</i> | NUT family member 2A                                                                           |
| <i>NUTM2B</i> | NUT family member 2B                                                                           |
| <i>NXT1</i>   | Nuclear transport factor 2 like export factor 1                                                |

Table SIV. Continued.

| Gene           | Gene name                                                                |
|----------------|--------------------------------------------------------------------------|
| <i>OGG1</i>    | 8-oxoguanine DNA glycosylase                                             |
| <i>OLFM4</i>   | Olfactomedin 4                                                           |
| <i>OPN1LW</i>  | Opsin 1, long wave sensitive                                             |
| <i>OTUB1</i>   | OTU deubiquitinase, ubiquitin aldehyde binding 1                         |
| <i>OVGP1</i>   | Oviductal glycoprotein 1                                                 |
| <i>P2RY2</i>   | Purinergic receptor P2Y2                                                 |
| <i>PAEP</i>    | Progesterone associated endometrial protein                              |
| <i>PAG1</i>    | Phosphoprotein membrane anchor with glycosphingolipid microdomains 1     |
| <i>PAK1</i>    | p21 (RAC1) activated kinase 1                                            |
| <i>PAK3</i>    | p21 (RAC1) activated kinase 3                                            |
| <i>PAK4</i>    | p21 (RAC1) activated kinase 4                                            |
| <i>PARK2</i>   | Parkin RBR E3 ubiquitin protein ligase                                   |
| <i>PARP1</i>   | Poly(ADP-ribose) polymerase 1                                            |
| <i>PAWR</i>    | Pro-apoptotic WT1 regulator                                              |
| <i>PAX2</i>    | Paired box 2                                                             |
| <i>PAX8</i>    | Paired box 8                                                             |
| <i>PCBP4</i>   | Poly(rC) binding protein 4                                               |
| <i>PCDH10</i>  | Protocadherin 10                                                         |
| <i>PCLAF</i>   | PCNA clamp associated factor                                             |
| <i>PCNA</i>    | Proliferating cell nuclear antigen                                       |
| <i>PDE7A</i>   | Phosphodiesterase 7A                                                     |
| <i>PDGFD</i>   | Platelet derived growth factor D                                         |
| <i>PDGFRA</i>  | Platelet derived growth factor receptor alpha                            |
| <i>PDGFRB</i>  | Platelet derived growth factor receptor beta                             |
| <i>PDIM1L</i>  | PDLIM1 interacting kinase 1 like                                         |
| <i>PELP1</i>   | Proline, glutamate and leucine rich protein 1                            |
| <i>PER1</i>    | Period circadian clock 1                                                 |
| <i>PER2</i>    | Period circadian clock 2                                                 |
| <i>PGF</i>     | Placental growth factor                                                  |
| <i>PGPEP1</i>  | Pyroglutamyl-peptidase I                                                 |
| <i>PGR</i>     | Progesterone receptor                                                    |
| <i>PGRMC1</i>  | Progesterone receptor membrane component 1                               |
| <i>PHF1</i>    | PHD finger protein 1                                                     |
| <i>PIGR</i>    | Polymeric immunoglobulin receptor                                        |
| <i>PIK3C2A</i> | Phosphatidylinositol-4-phosphate 3-kinase catalytic subunit type 2 alpha |
| <i>PIK3CA</i>  | Phosphatidylinositol-4,5-bisphosphate 3-kinase catalytic subunit alpha   |
| <i>PIK3CB</i>  | Phosphatidylinositol-4,5-bisphosphate 3-kinase catalytic subunit beta    |
| <i>PIK3CD</i>  | Phosphatidylinositol-4,5-bisphosphate 3-kinase catalytic subunit delta   |
| <i>PIK3CG</i>  | Phosphatidylinositol-4,5-bisphosphate 3-kinase catalytic subunit gamma   |
| <i>PIK3R1</i>  | Phosphoinositide-3-kinase regulatory subunit 1                           |
| <i>PIK3R2</i>  | Phosphoinositide-3-kinase regulatory subunit 2                           |
| <i>PIWIL2</i>  | Piwi like RNA-mediated gene silencing 2                                  |
| <i>PKN1</i>    | Protein kinase N1                                                        |
| <i>PLAT</i>    | Plasminogen activator, tissue type                                       |
| <i>PLAU</i>    | Plasminogen activator, urokinase                                         |
| <i>PLEK</i>    | Pleckstrin                                                               |
| <i>PLG</i>     | Plasminogen                                                              |
| <i>PLK1</i>    | Polo like kinase 1                                                       |
| <i>PLXNA1</i>  | Plexin A1                                                                |

Table SIV. Continued.

| Gene            | Gene name                                                                               |
|-----------------|-----------------------------------------------------------------------------------------|
| <i>PLXNA3</i>   | Plexin A3                                                                               |
| <i>PMS2</i>     | PMS1 homolog 2, mismatch repair system component                                        |
| <i>POLD1</i>    | DNA polymerase delta 1, catalytic subunit                                               |
| <i>POLE</i>     | DNA polymerase epsilon, catalytic subunit                                               |
| <i>POTEF</i>    | POTE ankyrin domain family member F                                                     |
| <i>POU5F1</i>   | POU class 5 homeobox 1                                                                  |
| <i>PPARD</i>    | Peroxisome proliferator activated receptor delta                                        |
| <i>PPARG</i>    | Peroxisome proliferator activated receptor gamma                                        |
| <i>PPIA</i>     | Peptidylprolyl isomerase A                                                              |
| <i>PPME1</i>    | Protein phosphatase methylesterase 1                                                    |
| <i>PPP1R2P9</i> | Protein phosphatase 1 regulatory inhibitor subunit 2 pseudogene 9                       |
| <i>PPP2R1A</i>  | Protein phosphatase 2 scaffold subunit Aalpha                                           |
| <i>PPP4C</i>    | Protein phosphatase 4 catalytic subunit                                                 |
| <i>PR@</i>      | Proline rich protein gene cluster                                                       |
| <i>PRAP1</i>    | Proline rich acidic protein 1                                                           |
| <i>PRB2</i>     | Proline rich protein BstNI subfamily 2                                                  |
| <i>PRDM2</i>    | PR/SET domain 2                                                                         |
| <i>PRKCA</i>    | Protein kinase C alpha                                                                  |
| <i>PRKDC</i>    | Protein kinase, DNA-activated, catalytic polypeptide                                    |
| <i>PRL</i>      | Prolactin                                                                               |
| <i>PRMT1</i>    | Protein arginine methyltransferase 1                                                    |
| <i>PRMT5</i>    | Protein arginine methyltransferase 5                                                    |
| <i>PROK1</i>    | Prokineticin 1                                                                          |
| <i>PROM1</i>    | Prominin 1                                                                              |
| <i>PRSS55</i>   | Protease, serine 55                                                                     |
| <i>PSG2</i>     | Pregnancy specific beta-1-glycoprotein 2                                                |
| <i>PSMD10</i>   | Proteasome 26S subunit, non-ATPase 10                                                   |
| <i>PSMD9</i>    | Proteasome 26S subunit, non-ATPase 9                                                    |
| <i>PSME3</i>    | Proteasome activator subunit 3                                                          |
| <i>PTEN</i>     | Phosphatase and tensin homolog                                                          |
| <i>PTENP1</i>   | Phosphatase and tensin homolog Pseudogene 1                                             |
| <i>PTENP1</i>   | Phosphatase and tensin homolog pseudogene 1                                             |
| <i>PTGER4</i>   | Prostaglandin E receptor 4                                                              |
| <i>PTGES2</i>   | Prostaglandin E synthase 2                                                              |
| <i>PTGS2</i>    | Prostaglandin-endoperoxide synthase 2                                                   |
| <i>PTPN6</i>    | Protein tyrosine phosphatase, non-receptor type 6                                       |
| <i>PTPRA</i>    | Protein tyrosine phosphatase, receptor type A                                           |
| <i>PWAR1</i>    | Prader Willi/Angelman region RNA 1                                                      |
| <i>PWAR4</i>    | Prader Willi/Angelman region RNA 4                                                      |
| <i>QPCT</i>     | Glutamyl-peptide cyclotransferase                                                       |
| <i>RAB32</i>    | RAB32, member RAS oncogene family                                                       |
| <i>RAB40B</i>   | RAB40B, member RAS oncogene family                                                      |
| <i>RAC1</i>     | Ras-related C3 botulinum toxin substrate 1 (rho family, small GTP binding protein Rac1) |
| <i>RAD50</i>    | RAD50 double strand break repair protein                                                |
| <i>RAF1</i>     | Raf-1 proto-oncogene, serine/threonine kinase                                           |
| <i>RARA</i>     | Retinoic acid receptor alpha                                                            |
| <i>RARB</i>     | Retinoic acid receptor beta                                                             |
| <i>RARRES1</i>  | Retinoic acid receptor responder 1                                                      |

Table SIV. Continued.

| Gene            | Gene name                                             |
|-----------------|-------------------------------------------------------|
| <i>RASSF1</i>   | Ras association domain family member 1                |
| <i>RB1</i>      | RB transcriptional corepressor 1                      |
| <i>RBL2</i>     | RB transcriptional corepressor like 2                 |
| <i>RBMX</i>     | RNA binding motif protein, X-linked                   |
| <i>RBMXP1</i>   | RNA binding motif protein, X-linked pseudogene 1      |
| <i>RBP1</i>     | Retinol binding protein 1                             |
| <i>RCAN1</i>    | Regulator of calcineurin 1                            |
| <i>RDH16</i>    | Retinol dehydrogenase 16 (all-trans)                  |
| <i>RELB</i>     | RELB proto-oncogene, NF-kB subunit                    |
| <i>RHOC</i>     | Ras homolog family member C                           |
| <i>RNF43</i>    | Ring finger protein 43                                |
| <i>RNR1</i>     | s-rRNA                                                |
| <i>RNU1-1</i>   | RNA, U1 small nuclear 1                               |
| <i>RPL10</i>    | Ribosomal protein L10                                 |
| <i>RPL11</i>    | Ribosomal protein L11                                 |
| <i>RPL22</i>    | Ribosomal protein L22                                 |
| <i>RPL36A</i>   | Ribosomal protein L36a                                |
| <i>RPS6KA6</i>  | Ribosomal protein S6 kinase A6                        |
| <i>RPSA</i>     | Ribosomal protein SA                                  |
| <i>RUNX1</i>    | Runt related transcription factor 1                   |
| <i>RUNX3</i>    | Runt related transcription factor 3                   |
| <i>RXFP1</i>    | Relaxin/insulin like family peptide receptor 1        |
| <i>RXFP3</i>    | Relaxin/insulin like family peptide receptor 3        |
| <i>S100A4</i>   | S100 calcium binding protein A4                       |
| <i>S100A6</i>   | S100 calcium binding protein A6                       |
| <i>S100A8</i>   | S100 calcium binding protein A8                       |
| <i>SAG</i>      | S-antigen visual arrestin                             |
| <i>SAIL</i>     | Suppression of anchorage independence 1               |
| <i>SALL4</i>    | Spalt like transcription factor 4                     |
| <i>SATB2</i>    | SATB homeobox 2                                       |
| <i>SCGB2A1</i>  | Secretoglobin family 2A member 1                      |
| <i>SCRIB</i>    | Scribbled planar cell polarity protein                |
| <i>SDC1</i>     | Syndecan 1                                            |
| <i>SDHB</i>     | Succinate dehydrogenase complex iron Sulfur subunit B |
| <i>SEMA3B</i>   | Semaphorin 3B                                         |
| <i>SEMA3F</i>   | Semaphorin 3F                                         |
| <i>SEMA6A</i>   | Semaphorin 6A                                         |
| <i>SERPINA6</i> | Serpin family A member 6                              |
| <i>SERPINB2</i> | Serpin family B member 2                              |
| <i>SERPINB5</i> | Serpin family B member 5                              |
| <i>SERPINE1</i> | Serpin family E member 1                              |
| <i>SERPINF2</i> | Serpin family F member 2                              |
| <i>SESN2</i>    | Sestrin 2                                             |
| <i>SETD2</i>    | SET domain containing 2                               |
| <i>SFRP4</i>    | Secreted frizzled related protein 4                   |
| <i>SGCG</i>     | Sarcoglycan gamma                                     |
| <i>SGSM3</i>    | Small G protein signaling modulator 3                 |
| <i>SH2B3</i>    | SH2B adaptor protein 3                                |
| <i>SHBG</i>     | Sex hormone binding globulin                          |
| <i>SIRT1</i>    | Sirtuin 1                                             |
| <i>SIRT2</i>    | Sirtuin 2                                             |
| <i>SIRT3</i>    | Sirtuin 3                                             |
| <i>SIRT4</i>    | Sirtuin 4                                             |
| <i>SIRT5</i>    | Sirtuin 5                                             |
| <i>SIRT6</i>    | Sirtuin 6                                             |
| <i>SIRT7</i>    | Sirtuin 7                                             |
| <i>SKP2</i>     | S-phase kinase associated protein 2                   |

Table SIV. Continued.

| Gene              | Gene name                                                                                         |
|-------------------|---------------------------------------------------------------------------------------------------|
| <i>SLC12A9</i>    | Solute carrier family 12 member 9                                                                 |
| <i>SLC14A2</i>    | Solute carrier family 14 member 2                                                                 |
| <i>SLC22A16</i>   | Solute carrier family 22 member 16                                                                |
| <i>SLC22A3</i>    | Solute carrier family 22 member 3                                                                 |
| <i>SLC25A20</i>   | Solute carrier family 25 member 20                                                                |
| <i>SLC52A2</i>    | Solute carrier family 52 member 2                                                                 |
| <i>SLC7A10</i>    | Solute carrier family 7 member 10                                                                 |
| <i>SLPI</i>       | Secretory leukocyte peptidase inhibitor                                                           |
| <i>SMAD2</i>      | SMAD family member 2                                                                              |
| <i>SMAD4</i>      | SMAD family member 4                                                                              |
| <i>SMAD7</i>      | SMAD family member 7                                                                              |
| <i>SMARCA1</i>    | SWI/SNF related, matrix associated, actin dependent regulator of chromatin, subfamily a, member 1 |
| <i>SMARCE1</i>    | SWI/SNF related, matrix associated, actin dependent regulator of chromatin, subfamily e, member 1 |
| <i>SMUG1</i>      | Single-strand-selective monofunctional uracil-DNA glycosylase 1                                   |
| <i>SNAI1</i>      | Snail family transcriptional repressor 1                                                          |
| <i>SNCG</i>       | Synuclein gamma                                                                                   |
| <i>SNHG12</i>     | Small nucleolar RNA host gene 12                                                                  |
| <i>SOAT1</i>      | Sterol O-acyltransferase 1                                                                        |
| <i>SOCS2</i>      | Suppressor of cytokine signaling 2                                                                |
| <i>SOCS3</i>      | Suppressor of cytokine signaling 3                                                                |
| <i>SOX1</i>       | SRY-box 1                                                                                         |
| <i>SOX4</i>       | SRY-box 4                                                                                         |
| <i>SOX7</i>       | SRY-box 7                                                                                         |
| <i>SOX9</i>       | SRY-box 9                                                                                         |
| <i>SP1</i>        | Sp1 transcription factor                                                                          |
| <i>SPA17</i>      | Sperm autoantigenic protein 17                                                                    |
| <i>SPAM1</i>      | Sperm adhesion molecule 1                                                                         |
| <i>SPARC</i>      | Secreted protein acidic and cysteine rich                                                         |
| <i>SPOP</i>       | Speckle type BTB/POZ protein                                                                      |
| <i>SPP1</i>       | Secreted phosphoprotein 1                                                                         |
| <i>SPZI</i>       | Spermatogenic leucine zipper 1                                                                    |
| <i>SQSTM1</i>     | Sequestosome 1                                                                                    |
| <i>SRA1</i>       | Steroid receptor RNA activator 1                                                                  |
| <i>SRC</i>        | SRC proto-oncogene, non-receptor tyrosine kinase                                                  |
| <i>SRD5A2</i>     | Steroid 5 alpha-reductase 2                                                                       |
| <i>SREBF1</i>     | Sterol regulatory element binding transcription factor 1                                          |
| <i>SRSF10</i>     | Serine and arginine rich splicing factor 10                                                       |
| <i>SSSCA1</i>     | Sjogren syndrome/scleroderma autoantigen 1                                                        |
| <i>SST</i>        | Somatostatin                                                                                      |
| <i>ST6GALNAC1</i> | ST6 N-acetylgalactosaminide alpha-2,6-sialyltransferase 1                                         |
| <i>STAR</i>       | Steroidogenic acute regulatory protein                                                            |
| <i>STARD13</i>    | StAR related lipid transfer domain containing 13                                                  |
| <i>STAT3</i>      | Signal transducer and activator of transcription 3                                                |
| <i>STC1</i>       | Stanniocalcin 1                                                                                   |
| <i>STK11</i>      | Serine/threonine kinase 11                                                                        |
| <i>STMN1</i>      | Stathmin 1                                                                                        |
| <i>STOML2</i>     | Stomatin like 2                                                                                   |
| <i>STS</i>        | Steroid sulfatase                                                                                 |

Table SIV. Continued.

| Gene                | Gene name                                                  |
|---------------------|------------------------------------------------------------|
| <i>SUB1</i>         | SUB1 homolog, transcriptional regulator                    |
| <i>SULT1A1</i>      | Sulfotransferase family 1A member 1                        |
| <i>SULT1E1</i>      | Sulfotransferase family 1E member 1                        |
| <i>SULT2A1</i>      | Sulfotransferase family 2A member 1                        |
| <i>SULT2B1</i>      | Sulfotransferase family 2B member 1                        |
| <i>SUMO1</i>        | Small ubiquitin-like modifier 1                            |
| <i>SUZ12</i>        | SUZ12 polycomb repressive complex 2 subunit                |
| <i>SYTL2</i>        | Synaptotagmin like 2                                       |
| <i>TAM</i>          | Myeloproliferative syndrome, transient (transient abnormal |
| <i>TBC1D9</i>       | TBC1 domain family member 9                                |
| <i>TBX1</i>         | T-box 1                                                    |
| <i>TCEAL7</i>       | Transcription elongation factor A like 7                   |
| <i>TCF4</i>         | Transcription factor 4                                     |
| <i>TCF7L2</i>       | Transcription factor 7 like 2                              |
| <i>TCHP</i>         | Trichoplein keratin filament binding                       |
| <i>TEAD4</i>        | TEA domain transcription factor 4                          |
| <i>TERC</i>         | Telomerase RNA component                                   |
| <i>TERF2</i>        | Telomeric repeat binding factor 2                          |
| <i>TERT</i>         | Telomerase reverse transcriptase                           |
| <i>TET2</i>         | Tet methylcytosine dioxygenase 2                           |
| <i>TFAP2C</i>       | Transcription factor AP-2 gamma                            |
| <i>TFF3</i>         | Trefoil factor 3                                           |
| <i>TGFA</i>         | Transforming growth factor alpha                           |
| <i>TGFB1</i>        | Transforming growth factor beta 1                          |
| <i>TGFB2</i>        | Transforming growth factor beta 2                          |
| <i>TGFB3</i>        | Transforming growth factor beta 3                          |
| <i>TGFBFR1</i>      | Transforming growth factor beta receptor 1                 |
| <i>TGFBFR2</i>      | Transforming growth factor beta receptor 2                 |
| <i>THADA</i>        | THADA, armadillo repeat containing                         |
| <i>THBS1</i>        | Thrombospondin 1                                           |
| <i>THBS2</i>        | Thrombospondin 2                                           |
| <i>THEMIS2</i>      | Thymocyte selection associated family member 2             |
| <i>THUMPD1</i>      | THUMP domain containing 1                                  |
| <i>TICAM2</i>       | Toll like receptor adaptor molecule 2                      |
| <i>TIMP1</i>        | TIMP metalloproteinase inhibitor 1                         |
| <i>TIMP2</i>        | TIMP metalloproteinase inhibitor 2                         |
| <i>TIMP3</i>        | TIMP metalloproteinase inhibitor 3                         |
| <i>TLR1</i>         | Toll like receptor 1                                       |
| <i>TLR2</i>         | Toll like receptor 2                                       |
| <i>TLR3</i>         | Toll like receptor 3                                       |
| <i>TLR4</i>         | Toll like receptor 4                                       |
| <i>TLR9</i>         | Toll like receptor 9                                       |
| <i>TMED7</i>        | Transmembrane p24 trafficking protein 7                    |
| <i>TMED7-TICAM2</i> | TMED7-TICAM2 readthrough                                   |
| <i>TICAM2</i>       |                                                            |
| <i>TMEM54</i>       | Transmembrane protein 54                                   |
| <i>TNF</i>          | Tumor necrosis factor                                      |
| <i>TNFRSF10C</i>    | TNF receptor superfamily member 10c                        |
| <i>TNFRSF11A</i>    | TNF receptor superfamily member 11a                        |
| <i>TNFRSF12A</i>    | TNF receptor superfamily member 12A                        |
| <i>TNFSF10</i>      | Tumor necrosis factor superfamily member 10                |
| <i>TNFSF11</i>      | Tumor necrosis factor superfamily member 11                |
| <i>TNFSF12</i>      | Tumor necrosis factor superfamily member 12                |

Table SIV. Continued.

| Gene            | Gene name                                                                      |
|-----------------|--------------------------------------------------------------------------------|
| <i>TNFSF12-</i> | TNFSF12-TNFSF13 readthrough                                                    |
| <i>TNFSF13</i>  |                                                                                |
| <i>TNK2</i>     | Tyrosine kinase non receptor 2                                                 |
| <i>TNKS2</i>    | Tankyrase 2                                                                    |
| <i>TOX4</i>     | TOX high mobility group box family member 4                                    |
| <i>TP53</i>     | Tumor protein p53                                                              |
| <i>TP73</i>     | Tumor protein p73                                                              |
| <i>TRAM1</i>    | Translocation associated membrane protein 1                                    |
| <i>TRIM22</i>   | Tripartite motif containing 22                                                 |
| <i>TRIM25</i>   | Tripartite motif containing 25                                                 |
| <i>TRIM27</i>   | Tripartite motif containing 27                                                 |
| <i>TRNL1</i>    | TRNA                                                                           |
| <i>TSC1</i>     | Tuberous sclerosis 1                                                           |
| <i>TSC2</i>     | Tuberous sclerosis 2                                                           |
| <i>TSHZ1</i>    | Teashirt zinc finger homeobox 1                                                |
| <i>TSNAX</i>    | Translin associated factor X                                                   |
| <i>TSPYL2</i>   | TSPY like 2                                                                    |
| <i>TUBA1B</i>   | Tubulin alpha 1b                                                               |
| <i>TWIST1</i>   | Twist family bHLH transcription factor 1                                       |
| <i>TYMP</i>     | Thymidine phosphorylase                                                        |
| <i>TYMS</i>     | Thymidylate synthetase                                                         |
| <i>UBE2N</i>    | Ubiquitin conjugating enzyme E2 N                                              |
| <i>UCN</i>      | Urocortin                                                                      |
| <i>UCP2</i>     | Uncoupling protein 2                                                           |
| <i>UGT1A1</i>   | UDP glucuronosyltransferase family 1 member A1                                 |
| <i>UGT2B17</i>  | UDP glucuronosyltransferase family 2 member B17                                |
| <i>UGT2B7</i>   | UDP glucuronosyltransferase family 2 member B7                                 |
| <i>UHRF1</i>    | Ubiquitin like with PHD and ring finger domains 1                              |
| <i>UTS2R</i>    | Urotensin 2 receptor                                                           |
| <i>VCAN</i>     | Versican                                                                       |
| <i>VEGFA</i>    | Vascular endothelial growth factor A                                           |
| <i>VEGFB</i>    | Vascular endothelial growth factor B                                           |
| <i>VIM</i>      | Vimentin                                                                       |
| <i>VPS51</i>    | VPS51, GARP complex subunit                                                    |
| <i>WDTC1</i>    | WD and tetratricopeptide repeats 1                                             |
| <i>WFDC2</i>    | WAP four-disulfide core domain 2                                               |
| <i>WLS</i>      | Wntless Wnt ligand secretion mediator                                          |
| <i>WNT10B</i>   | Wnt family member 10B                                                          |
| <i>WNT2</i>     | Wnt family member 2                                                            |
| <i>WNT4</i>     | Wnt family member 4                                                            |
| <i>WT1</i>      | Wilms tumor 1                                                                  |
| <i>WWOX</i>     | WW domain containing oxidoreductase                                            |
| <i>XIAP</i>     | X-linked inhibitor of apoptosis                                                |
| <i>XPA</i>      | XPA, DNA damage recognition and repair factor                                  |
| <i>XPC</i>      | XPC complex subunit, DNA damage recognition and repair factor                  |
| <i>XRCC1</i>    | X-ray repair cross complementing 1                                             |
| <i>XRCC3</i>    | X-ray repair cross complementing 3                                             |
| <i>YTHDC1</i>   | YTH domain containing 1                                                        |
| <i>YWHAE</i>    | Tyrosine 3-monooxygenase/tryptophan 5-monooxygenase activation protein epsilon |
| <i>ZC3H7A</i>   | Zinc finger CCCH-type containing 7A                                            |
| <i>ZC3H7B</i>   | Zinc finger CCCH-type containing 7B                                            |

Table SIV. Continued.

---

| Gene           | Gene name                            |
|----------------|--------------------------------------|
| <i>ZEB1</i>    | Zinc finger E-box binding homeobox 1 |
| <i>ZFH3</i>    | Zinc finger homeobox 3               |
| <i>ZFP36L1</i> | ZFP36 ring finger protein like 1     |
| <i>ZHX2</i>    | Zinc fingers and homeoboxes 2        |
| <i>ZIC2</i>    | Zic family member 2                  |
| <i>ZMYND10</i> | Zinc finger MYND-type containing 10  |
| <i>ZNF645</i>  | Zinc finger protein 645              |

---



Table SV. Association analysis of sample clusters with endometrial cancer clinicopathological parameters.

| Clinicopathological parameter | Cluster 1 | Cluster 2 | Cluster 3 | Cluster 4 | P-value |
|-------------------------------|-----------|-----------|-----------|-----------|---------|
| Histology                     |           |           |           |           | <0.0001 |
| Endometrioid                  | 38        | 67        | 100       | 66        |         |
| Mixed                         | 1         | 1         | 1         | 7         |         |
| Serous                        | 2         | 18        | 1         | 31        |         |
| Stage                         |           |           |           |           | 0.0004  |
| I                             | 27        | 58        | 85        | 53        |         |
| II                            | 4         | 5         | 4         | 6         |         |
| III                           | 8         | 14        | 12        | 36        |         |
| IV                            | 1         | 6         | 1         | 8         |         |
| Histological grade            |           |           |           |           | <0.0001 |
| Grade 1                       | 6         | 23        | 43        | 6         |         |
| Grade 2                       | 10        | 26        | 43        | 12        |         |
| Grade 3                       | 25        | 37        | 16        | 86        |         |
| Molecular subtype             |           |           |           |           | <0.0001 |
| CN High                       | 6         | 19        | 2         | 33        |         |
| CN Low                        | 2         | 28        | 57        | 3         |         |
| MSI                           | 15        | 18        | 16        | 16        |         |
| POLE                          | 3         | 6         | 2         | 6         |         |

CN, copy number; MSI, microsatellite instability; POLE, DNA polymerase  $\epsilon$ . The number of cases corresponding to each category per cluster is shown for histological type, FIGO stage, grade and molecular subtype. Statistical analysis was conducted using Fisher's exact test.
